# Supplementary material for: Effect of an Intensive Lifestyle Intervention on Circulating Biomarkers of Atrial Fibrillation-Related Pathways among Adults with Metabolic Syndrome: Results from a Randomized Trial
Source: MDPI journal article supplement (doi:10.3390/jcm13072132), 2024-04-07
Supplement: s1 [file s1]

Supplemental Table S1. Medication mainly used by people with metabolic syndrome in intervention groups at baseline, years 3 and 5

|                         | Baseline |         |         | Year 3 |         |         | Year 5 |         |         |
|-------------------------|----------|---------|---------|--------|---------|---------|--------|---------|---------|
|                         | ILI      | control | p-value | ILI    | control | p-value | ILI    | control | p-value |
| Antihypertensive drugs  | 76.7     | 76.7    | 1.00    | 80.8   | 77.6    | 0.37    | 84.2   | 84.6    | 0.92    |
| Lipid-lowering drugs    | 49.6     | 51.9    | 0.60    | 51.3   | 51.3    | 0.998   | 49     | 51.9    | 0.51    |
| Oral antidiabetic drugs | 21.8     | 21.8    | 1.00    | 26.3   | 29.7    | 0.38    | 35.7   | 36.1    | 0.93    |

*\*Chi-square test was used to test for significant differences between ILI and control groups.*

Supplemental Table S2. Effect of an intensive lifestyle intervention (ILI) on selected circulating biomarkers stratified by sex and age, PREDIMED-Plus trial

|                    |           | Difference ILI - control |                  |                         |
|--------------------|-----------|--------------------------|------------------|-------------------------|
|                    |           | Y3 vs baseline           | Y5 vs baseline   | p-value for interaction |
| Male (n=318)       | PICP      | -4% (-12%, 6%)           | -5% (-14%, 5%)   |                         |
|                    | hs-TnT    | -4% (-9%, 3%)            | -2% (-8%, 4%)    |                         |
|                    | hsCRP     | -15% (-31%, 6%)          | -25% (-40%, -7%) |                         |
|                    | 3-NT      | -12% (-25%, 3%)          | -12% (-25%, 3%)  |                         |
|                    | NT-proBNP | -5% (-19%, 11%)          | -20% (-32%, -5%) |                         |
| Female (n=214)     | PICP      | 2% (-11%, 15%)           | 3% (-9%, 18%)    | 0.95                    |
|                    | hs-TnT    | 1% (-6%, 8%)             | -4% (-11%, 3%)   | 0.62                    |
|                    | hsCRP     | -1% (-19%, 21%)          | 7% (-13%, 32%)   | 0.46                    |
|                    | 3-NT      | -7% (-22%, 11%)          | -22% (-35%, -7%) | 0.27                    |
|                    | NT-proBNP | 4% (-17%, 30%)           | 0% (-21%, 26%)   | 0.58                    |
| Age <65<br>(n=236) | PICP      | -1% (-11%, 9%)           | -5% (-14%, 5%)   |                         |
|                    | hs-TnT    | -4% (-11%, 3%)           | -1% (-8%, 6%)    |                         |
|                    | hsCRP     | -13% (-31%, 10%)         | -22% (-38%, -2%) |                         |
|                    | 3-NT      | -9% (-24%, 11%)          | -10% (-25%, 9%)  |                         |
|                    | NT-proBNP | -11% (-28%, 9%)          | -12% (-29%, 8%)  |                         |
| Age ≥65 (296)      | PICP      | -1% (-12%, 11%)          | 1% (-10%, 14%)   | 0.78                    |
|                    | hs-TnT    | 1% (-5%, 7%)             | -4% (-9%, 2%)    | 0.18                    |
|                    | hsCRP     | -7% (-24%, 14%)          | -7% (-25%, 15%)  | 0.99                    |

|           |                 |                  |      |
|-----------|-----------------|------------------|------|
| 3-NT      | -11% (-23%, 3%) | -21% (-32%, -8%) | 0.37 |
| NT-proBNP | 9% (-9%, 29%)   | -11% (-25%, 6%)  | 0.49 |

Notes: Mixed models were used. Results are shown as estimate (95% confidence interval). All the concentrations of biomarkers were log-transformed. Percent changes in concentrations of biomarkers comparing intervention and control arm were presented, calculated as  $[\exp(\text{coefficient})-1]*100$ . Follow-up exams occurred in years 3 and 5. PICP: C-terminal propeptide of procollagen type I; hsTnT: high sensitivity troponin T; hsCRP: high-sensitivity C reactive protein; 3-NT: 3-nitrotyrosine; NT-proBNP: N-terminal propeptide of B-type natriuretic peptide.

Supplemental Table S3. Changes in log-transformed concentrations of biomarkers through 3 and 5 years according to the intervention group and follow-up time, missing value imputed by multiple imputation by chained equation (MICE), PREDIMED-Plus trial

|           | Difference ILI - control |                  |
|-----------|--------------------------|------------------|
|           | Y3 vs. baseline          | Y5 vs. baseline  |
| PICP      | 0% (-8%, 9%)             | -1% (-9%, 8%)    |
| hsTnT     | -1% (-6%, 5%)            | -3% (-9%, 2%)    |
| hsCRP     | -6% (-20%, 10%)          | -12% (-25%, 5%)  |
| 3-NT      | -8% (-20%, 5%)           | -14% (-25%, -1%) |
| NT-proBNP | 1% (-13%, 16%)           | -11% (-24%, 3%)  |

Notes: Mixed models were used. Results are shown as estimate (95% confidence interval). All the concentrations of biomarkers were log-transformed. Percent changes in concentrations of biomarkers comparing intervention and control arm were presented, calculated as  $[\exp(\text{coefficient})-1]*100$ . PICP: C-terminal propeptide of procollagen type I; hsTnT: high sensitivity troponin T; hsCRP: high-sensitivity C reactive protein; 3-NT: 3-nitrotyrosine; NT-proBNP: N-terminal propeptide of B-type natriuretic peptide.

Supplemental Table S4. Changes in log-transformed concentrations of biomarkers through 3 and 5 years according to the intervention group and follow-up time, adjust for covariates at baseline, PREDIMED-Plus trial

|           | Difference ILI - control |                  |
|-----------|--------------------------|------------------|
|           | Y3 vs. baseline          | Y5 vs. baseline  |
| PICP      | -1% (-9%, 7%)            | -1% (-8%, 7%)    |
| hsTnT     | -2% (-6%, 3%)            | -2% (-7%, 3%)    |
| hsCRP     | -9% (-22%, 6%)           | -13% (-26%, 2%)  |
| 3-NT      | -7% (-18%, 5%)           | -13% (-23%, -2%) |
| NT-proBNP | -3% (-15%, 11%)          | -13% (-24%, 0%)  |

Notes: Mixed models were used, adjusting for sex, age, education level, marital status, smoking, Mediterranean diet adherence score, and total physical activity at baseline. Results are shown as estimate (95% confidence interval). All the concentrations of biomarkers were log-transformed. Percent changes in concentrations of biomarkers comparing intervention and control arm were presented, calculated as  $[\exp(\text{coefficient})-1]*100$ . Follow-up exams occurred in years 3 and 5. PICP: C-terminal propeptide of procollagen type I; hsTnT: high sensitivity troponin T; hsCRP: high-sensitivity C reactive protein; 3-NT: 3-nitrotyrosine; NT-proBNP: N-terminal propeptide of B-type natriuretic peptide.

Supplemental Table S5. Changes in log-transformed concentrations of biomarkers through 3 and 5 years according to the intervention group and follow-up time, adjust for eGFR, PREDIMED-Plus trial

|                  | Difference ILI - control |                  |
|------------------|--------------------------|------------------|
|                  | Y3 vs baseline           | Y5 vs baseline   |
| PICP, mg/mL      | -1% (-9%, 7%)            | -2% (-9%, 7%)    |
| hs-TnT, ng/L     | -2% (-6%, 3%)            | -2% (-7%, 2%)    |
| hsCRP, mg/dL     | -10% (-23%, 4%)          | -14% (-26%, 1%)  |
| 3-NT, nM         | -11% (-21%, 1%)          | -16% (-26%, -5%) |
| NT-proBNP, pg/mL | -2% (-14%, 13%)          | -11% (-22%, 2%)  |

Notes: Mixed models were used. Results are shown as estimate (95% confidence interval). All the concentrations of biomarkers were log-transformed. Percent changes in concentrations of biomarkers comparing intervention and control arm were presented, calculated as  $[\exp(\text{coefficient})-1]*100$ . Follow-up exams occurred in years 3 and 5. PICP: C-terminal propeptide of procollagen type I; hsTnT: high sensitivity troponin T; hsCRP: high-sensitivity C reactive protein; 3-NT: 3-nitrotyrosine; NT-proBNP: N-terminal propeptide of B-type natriuretic peptide.
